# Supplementary material for: DoctorBOT: An AI-powered Chatbot for Evidence-Based Obstetric Hemorrhage Management in Low-Resource Settings
Source: Research Square preprint supplement (doi:10.21203/rs.3.rs-6580160/v1), 2025-06-04
Supplement: Supplementary file 1 [file 88b65499be278ccf16c499e9.pdf]

## Evaluation of the Language Model Prototype for Postpartum Hemorrhage Care

### Instructions:

Please rate each AI-generated response using a scale from 1 (very poor) to 10 (excellent) according to the following criteria. Feel free to add comments if needed.

### Evaluation criteria:

- *Accuracy*: Is the information correct?
- *Relevance*: Is it pertinent, and does it cover key points?
- *Clarity*: Is it easy to understand?
- *Coherence*: Is the sequence logical and human-like?
- *Clinical Usefulness*: Is it applicable in a real clinical setting?

### ◆ Question 1

What are my alternatives if oxytocin is not available for managing postpartum hemorrhage?

|                     |                      |        |
|---------------------|----------------------|--------|
| Accuracy            | <input type="text"/> | (1-10) |
| Relevance           | <input type="text"/> | (1-10) |
| Clarity             | <input type="text"/> | (1-10) |
| Coherence           | <input type="text"/> | (1-10) |
| Clinical Usefulness | <input type="text"/> | (1-10) |

 Comment:

### ◆ Question 2

Are there any drug interactions I should consider before administering uterotonics?

|                     |                      |        |
|---------------------|----------------------|--------|
| Accuracy            | <input type="text"/> | (1-10) |
| Relevance           | <input type="text"/> | (1-10) |
| Clarity             | <input type="text"/> | (1-10) |
| Coherence           | <input type="text"/> | (1-10) |
| Clinical Usefulness | <input type="text"/> | (1-10) |

 Comment:

### ◆ Question 3

What are the signs of toxicity or serious side effects of drugs used to manage hemorrhage?

|                     |                      |        |
|---------------------|----------------------|--------|
| Accuracy            | <input type="text"/> | (1-10) |
| Relevance           | <input type="text"/> | (1-10) |
| Clarity             | <input type="text"/> | (1-10) |
| Coherence           | <input type="text"/> | (1-10) |
| Clinical Usefulness | <input type="text"/> | (1-10) |

 Comment:

### ◆ Question 4

How should tranexamic acid be administered correctly in cases of severe hemorrhage?

|                     |                          |        |
|---------------------|--------------------------|--------|
| Accuracy            | <input type="checkbox"/> | (1-10) |
| Relevance           | <input type="checkbox"/> | (1-10) |
| Clarity             | <input type="checkbox"/> | (1-10) |
| Coherence           | <input type="checkbox"/> | (1-10) |
| Clinical Usefulness | <input type="checkbox"/> | (1-10) |

 Comment:

### Question 5

What protocols should I follow if the patient has known allergies to common hemorrhage medications?

|                     |                          |        |
|---------------------|--------------------------|--------|
| Accuracy            | <input type="checkbox"/> | (1-10) |
| Relevance           | <input type="checkbox"/> | (1-10) |
| Clarity             | <input type="checkbox"/> | (1-10) |
| Coherence           | <input type="checkbox"/> | (1-10) |
| Clinical Usefulness | <input type="checkbox"/> | (1-10) |

 Comment:

### Question 6

What precautions should I take when administering IV medications in a rural setting?  
(Model response: "I don't know")

|                     |                          |        |
|---------------------|--------------------------|--------|
| Accuracy            | <input type="checkbox"/> | (1-10) |
| Relevance           | <input type="checkbox"/> | (1-10) |
| Clarity             | <input type="checkbox"/> | (1-10) |
| Coherence           | <input type="checkbox"/> | (1-10) |
| Clinical Usefulness | <input type="checkbox"/> | (1-10) |

 Comment:

### Question 7

Are there strategies to optimize using limited pharmacological resources during a postpartum hemorrhage emergency?

|                     |                          |        |
|---------------------|--------------------------|--------|
| Accuracy            | <input type="checkbox"/> | (1-10) |
| Relevance           | <input type="checkbox"/> | (1-10) |
| Clarity             | <input type="checkbox"/> | (1-10) |
| Coherence           | <input type="checkbox"/> | (1-10) |
| Clinical Usefulness | <input type="checkbox"/> | (1-10) |

 Comment:

### Question 8

What are the first signs of postpartum hemorrhage I should monitor?

|           |                          |        |
|-----------|--------------------------|--------|
| Accuracy  | <input type="checkbox"/> | (1-10) |
| Relevance | <input type="checkbox"/> | (1-10) |
| Clarity   | <input type="checkbox"/> | (1-10) |
| Coherence | <input type="checkbox"/> | (1-10) |

|                     |                                 |
|---------------------|---------------------------------|
| Clinical Usefulness | <input type="checkbox"/> (1-10) |
|---------------------|---------------------------------|

 Comment:

### Question 9

What protocol should I follow immediately after identifying postpartum hemorrhage?

|                     |                                 |
|---------------------|---------------------------------|
| Accuracy            | <input type="checkbox"/> (1-10) |
| Relevance           | <input type="checkbox"/> (1-10) |
| Clarity             | <input type="checkbox"/> (1-10) |
| Coherence           | <input type="checkbox"/> (1-10) |
| Clinical Usefulness | <input type="checkbox"/> (1-10) |

 Comment:

### Question 10

How can I differentiate between uterine atony and other types of hemorrhage?

|                     |                                 |
|---------------------|---------------------------------|
| Accuracy            | <input type="checkbox"/> (1-10) |
| Relevance           | <input type="checkbox"/> (1-10) |
| Clarity             | <input type="checkbox"/> (1-10) |
| Coherence           | <input type="checkbox"/> (1-10) |
| Clinical Usefulness | <input type="checkbox"/> (1-10) |

 Comment:

### Evaluator Background

Based on your experience, how would you classify yourself in obstetric emergency care?

☐ Novice   ☐ Beginner   ☐ Competent   ☐ Proficient   ☐ Expert

Years of experience in obstetric patient care:

☐ 0–3 years   ☐ 3–6 years   ☐ 6–10 years   ☐ More than 10 years

 Brief description of your experience:
